# Supplementary material
Source: PubMed Central journal article supplement (PMC4205635)
Supplement: pnas.1415655111.sd01.pdf [file pnas.1415655111.sd01.pdf]

**Table S1.** VLRA and VLRC assembly status in single cells supports the notion that VLRC assembly occurs prior to VLRA

| VLRA+ Cells                                                                                    |          |            |          |        | VLRC+ Cells |          |            |          |        |                      |
|------------------------------------------------------------------------------------------------|----------|------------|----------|--------|-------------|----------|------------|----------|--------|----------------------|
| VLRA Locus                                                                                     |          | VLRC Locus |          | Number | VLRA Locus  |          | VLRC Locus |          | Number |                      |
| Allele 1                                                                                       | Allele 2 | Allele 1   | Allele 2 |        | Allele 1    | Allele 2 | Allele 1   | Allele 2 |        |                      |
| F                                                                                              | GL       | GL         | GL       | 60     | GL          | GL       | F          | GL       | 91     |                      |
| F                                                                                              | GL       | NF         | GL       | 26     | NF          | GL       | F          | GL       | 8      |                      |
| F                                                                                              | GL       | F          | GL       | 16     | F           | GL       | F          | GL       | 2      |                      |
| F                                                                                              | GL       | NF         | NF       | 3      | NF          | NF       | F          | GL       | 1      |                      |
| F                                                                                              | GL       | NF         | F        | 3      | GL          | GL       | NF         | F        | 5      |                      |
| F                                                                                              | NF       | GL         | GL       | 3      | GL          | GL       | F          | F        | 7      |                      |
| F                                                                                              | F        | GL         | GL       | 1      | NF          | GL       | NF         | F        | 1      |                      |
| F                                                                                              | NF       | F          | GL       | 1      | NF          | GL       | F          | F        | 1      |                      |
| # with biallelic assembly                                                                      |          |            |          | 5/113  |             |          |            |          | 14/117 | P<br>0.032<br><0.001 |
| # with two functional assemblies                                                               |          |            |          | 1/5    |             |          |            |          | 8/14   |                      |
| # with other VLR gene assembled                                                                |          |            |          | 49/113 |             |          |            |          | 13/117 |                      |
| F = Functional assembly; NF = Non-functional assembly; GL = Unassembled germline configuration |          |            |          |        |             |          |            |          |        |                      |
