# Supplementary material
Source: PubMed Central journal article supplement (PMC4205635)
Supplement: pnas.1415655111.sd03.pdf [file pnas.1415655111.sd03.pdf]

Table S3.

| Gene | Clade   | Source | Species      | Origin | Motile    |         |           |            |                     |         |           |         | Figure    | GenBank Accession                                                                               | Notes |      |      |                                      |                       |      |                                                  |                                                 |                             |
|------|---------|--------|--------------|--------|-----------|---------|-----------|------------|---------------------|---------|-----------|---------|-----------|-------------------------------------------------------------------------------------------------|-------|------|------|--------------------------------------|-----------------------|------|--------------------------------------------------|-------------------------------------------------|-----------------------------|
|      |         |        |              |        | LRR1      |         | LRRV      |            | LRRvt               |         | LRRCP     |         |           |                                                                                                 |       |      |      |                                      |                       |      |                                                  |                                                 |                             |
|      |         |        |              |        | Consensus | Entropy | Consensus | Entropy    | Consensus           | Entropy | Consensus | Entropy |           |                                                                                                 |       |      |      |                                      |                       |      |                                                  |                                                 |                             |
| VLRA | Lamprey | Pooled | All Combined | Blood  | G         | 1.01    | G         | 2.85       | K                   | 1.95    | S         | 1.03    | Figure S4 | KC732889-<br>KC733075<br>ABO21121-<br>ABO21311<br>CD543372<br>EP094706<br>ACT31446-<br>ACT31458 |       |      |      |                                      |                       |      |                                                  |                                                 |                             |
|      |         |        |              |        | I         | 0.11    | L         | 0.08       | L                   | 0.04    | L         | 0.04    |           |                                                                                                 |       |      |      |                                      |                       |      |                                                  |                                                 |                             |
|      |         |        |              |        | P         | 0.84    | T         | 1.65       | V                   | 1.52    | T         | 1.10    |           |                                                                                                 |       |      |      |                                      |                       |      |                                                  |                                                 |                             |
|      |         |        |              |        | T         | 0.55    | K         | 2.11       | N                   | 1.80    | K         | 0.61    |           |                                                                                                 |       |      |      |                                      |                       |      |                                                  |                                                 |                             |
|      |         |        |              |        | S         | 0.43    | L         | 0.06       | L                   | 0.00    | V         | 0.00    |           |                                                                                                 |       |      |      |                                      |                       |      |                                                  |                                                 |                             |
|      |         |        |              |        | T         | 0.04    | T         | 2.01       | E                   | 1.93    | E         | 1.08    |           |                                                                                                 |       |      |      |                                      |                       |      |                                                  |                                                 |                             |
|      |         |        |              |        | E         | 2.10    | Y         | 3.29       | T                   | 2.68    | M         | 0.64    |           |                                                                                                 |       |      |      |                                      |                       |      |                                                  |                                                 |                             |
|      |         |        |              |        | K         | 1.93    | L         | 0.00       | L                   | 0.09    | L         | 0.12    |           |                                                                                                 |       |      |      |                                      |                       |      |                                                  |                                                 |                             |
|      |         |        |              |        | L         | 0.00    | N         | 3.08       | W                   | 3.01    | Q         | 1.91    |           |                                                                                                 |       |      |      |                                      |                       |      |                                                  |                                                 |                             |
|      |         |        |              |        | Q         | 1.60    | L         | 0.42       | L                   | 0.17    | L         | 0.00    |           |                                                                                                 |       |      |      |                                      |                       |      |                                                  |                                                 |                             |
|      |         |        |              |        | L         | 0.53    | D         | 3.12       | R                   | 3.15    | H         | 2.90    |           |                                                                                                 |       |      |      |                                      |                       |      |                                                  |                                                 |                             |
|      |         |        |              |        | N         | 2.48    | S         | 3.37       | E                   | 2.90    | N         | 2.37    |           |                                                                                                 |       |      |      |                                      |                       |      |                                                  |                                                 |                             |
|      |         |        |              |        | Y         | 1.50    | N         | 0.17       | N                   | 0.00    | N         | 0.00    |           |                                                                                                 |       |      |      |                                      |                       |      |                                                  |                                                 |                             |
|      |         |        |              |        | N         | 0.92    | Q         | 0.99       | K                   | 1.66    | P         | 2.12    |           |                                                                                                 |       |      |      |                                      |                       |      |                                                  |                                                 |                             |
|      |         |        |              |        | S         | 1.88    | L         | 0.43       | L                   | 0.00    | W         | 0.77    |           |                                                                                                 |       |      |      |                                      |                       |      |                                                  |                                                 |                             |
|      |         |        |              |        | L         | 1.03    | Q         | 1.96       | Q                   | 0.15    | D         | 0.81    |           |                                                                                                 |       |      |      |                                      |                       |      |                                                  |                                                 |                             |
|      |         |        |              |        | T         | 1.86    | Y         | 1.47       | S                   | 0.04    |           |         |           |                                                                                                 |       |      |      |                                      |                       |      |                                                  |                                                 |                             |
|      |         |        |              |        | G         | 1.65    | L         | 1.11       | V                   | 0.04    |           |         |           |                                                                                                 |       |      |      |                                      |                       |      |                                                  |                                                 |                             |
|      |         |        |              |        | I         | 0.56    | P         | 0.98       | P                   | 0.09    |           |         |           |                                                                                                 |       |      |      |                                      |                       |      |                                                  |                                                 |                             |
|      |         |        |              |        | P         | 1.17    | V         | 2.78       | D                   | 0.89    |           |         |           |                                                                                                 |       |      |      |                                      |                       |      |                                                  |                                                 |                             |
|      |         |        |              |        | P         | 1.95    | G         | 1.17       | G                   | 0.00    |           |         |           |                                                                                                 |       |      |      |                                      |                       |      |                                                  |                                                 |                             |
|      |         |        |              |        | T         | 1.95    | V         | 1.28       | A                   | 0.17    |           |         |           |                                                                                                 |       |      |      |                                      |                       |      |                                                  |                                                 |                             |
|      |         |        |              |        | A         | 0.50    | F         | 0.05       | F                   | 0.00    |           |         |           |                                                                                                 |       |      |      |                                      |                       |      |                                                  |                                                 |                             |
|      |         |        |              |        | F         | 0.00    | D         | 0.66       | D                   | 0.38    |           |         |           |                                                                                                 |       |      |      |                                      |                       |      |                                                  |                                                 |                             |
|      |         |        |              |        | Q         | 2.06    |           |            |                     |         |           |         |           |                                                                                                 |       |      |      |                                      |                       |      |                                                  |                                                 |                             |
|      |         |        |              |        | VLRA      | Hagfish | Pooled    | E. stoutii | Blood               | D       | 0.00      | H       |           |                                                                                                 |       | 2.60 | K    | 0.94                                 | K                     | 0.68 | Figure S4                                        | KF314046-<br>KF314110                           |                             |
|      |         |        |              |        |           |         |           |            |                     | I       | 0.00      | L       |           |                                                                                                 |       | 0.09 | L    | 0.00                                 | L                     | 0.34 |                                                  |                                                 |                             |
|      |         |        |              |        |           |         |           |            |                     | Q       | 0.00      | V       |           |                                                                                                 |       | 2.25 | R    | 0.51                                 | S                     | 0.00 |                                                  |                                                 |                             |
| K    | 0.00    | K      | 2.25         | E      |           |         |           |            |                     | 2.06    | K         | 0.54    |           |                                                                                                 |       |      |      |                                      |                       |      |                                                  |                                                 |                             |
| D    | 0.00    | L      | 0.00         | L      |           |         |           |            |                     | 0.00    | L         | 0.00    |           |                                                                                                 |       |      |      |                                      |                       |      |                                                  |                                                 |                             |
| A    | 0.00    | T      | 2.05         | K      |           |         |           |            |                     | 1.85    | E         | 0.99    |           |                                                                                                 |       |      |      |                                      |                       |      |                                                  |                                                 |                             |
| E    | 0.00    | Y      | 3.21         | T      |           |         |           |            |                     | 2.16    | T         | 1.38    |           |                                                                                                 |       |      |      |                                      |                       |      |                                                  |                                                 |                             |
| K    | 0.59    | L      | 0.09         | L      |           |         |           |            |                     | 0.00    | I         | 0.32    |           |                                                                                                 |       |      |      |                                      |                       |      |                                                  |                                                 |                             |
| L    | 0.00    | S      | 3.32         | Y      |           |         |           |            |                     | 2.86    | F         | 2.52    |           |                                                                                                 |       |      |      |                                      |                       |      |                                                  |                                                 |                             |
| D    | 1.17    | L      | 0.49         | L      |           |         |           |            |                     | 0.47    | L         | 0.00    |           |                                                                                                 |       |      |      |                                      |                       |      |                                                  |                                                 |                             |
| L    | 0.00    | N      | 3.12         | Q      |           |         |           |            |                     | 3.15    | T         | 2.98    |           |                                                                                                 |       |      |      |                                      |                       |      |                                                  |                                                 |                             |
| K    | 1.48    | N      | 3.37         | N      |           |         |           |            |                     | 2.55    | D         | 2.47    |           |                                                                                                 |       |      |      |                                      |                       |      |                                                  |                                                 |                             |
| Y    | 0.54    | N      | 0.00         | N      |           |         |           |            |                     | 0.00    | N         | 0.00    |           |                                                                                                 |       |      |      |                                      |                       |      |                                                  |                                                 |                             |
| N    | 0.00    | Q      | 1.32         | Q      |           |         |           |            |                     | 0.27    | D         | 1.11    |           |                                                                                                 |       |      |      |                                      |                       |      |                                                  |                                                 |                             |
| S    | 0.27    | L      | 0.00         | L      |           |         |           |            |                     | 0.00    | W         | 0.00    |           |                                                                                                 |       |      |      |                                      |                       |      |                                                  |                                                 |                             |
| L    | 0.00    | Q      | 1.45         | R      |           |         |           |            |                     | 0.72    | D         | 0.00    |           |                                                                                                 |       |      |      |                                      |                       |      |                                                  |                                                 |                             |
| S    | 0.00    | S      | 1.98         | S      |           |         |           |            |                     | 0.74    |           |         |           |                                                                                                 |       |      |      |                                      |                       |      |                                                  |                                                 |                             |
| K    | 0.61    | L      | 0.24         | V      |           |         |           |            |                     | 0.34    |           |         |           |                                                                                                 |       |      |      |                                      |                       |      |                                                  |                                                 |                             |
| L    | 0.00    | P      | 0.05         | P      |           |         |           |            |                     | 0.00    |           |         |           |                                                                                                 |       |      |      |                                      |                       |      |                                                  |                                                 |                             |
| S    | 1.24    | F      | 2.97         | D      |           |         |           |            |                     | 1.03    |           |         |           |                                                                                                 |       |      |      |                                      |                       |      |                                                  |                                                 |                             |
| P    | 0.57    | G      | 1.00         | K      |           |         |           |            |                     | 0.73    |           |         |           |                                                                                                 |       |      |      |                                      |                       |      |                                                  |                                                 |                             |
| T    | 0.77    | V      | 0.95         | A      |           |         |           |            |                     | 0.70    |           |         |           |                                                                                                 |       |      |      |                                      |                       |      |                                                  |                                                 |                             |
| A    | 0.27    | F      | 0.00         | F      |           |         |           |            |                     | 0.00    |           |         |           |                                                                                                 |       |      |      |                                      |                       |      |                                                  |                                                 |                             |
| F    | 0.00    | D      | 0.37         | D      |           |         |           |            |                     | 0.50    |           |         |           |                                                                                                 |       |      |      |                                      |                       |      |                                                  |                                                 |                             |
| H    | 0.27    |        |              |        |           |         |           |            |                     |         |           |         |           |                                                                                                 |       |      |      |                                      |                       |      |                                                  |                                                 |                             |
| VLRA | Hagfish | Pooled | E. burgeri   | Blood  |           |         |           |            |                     | N       | 0.00      | H       | 2.70      | K                                                                                               | 1.03  | S    | 0.50 | Figure S2B<br>(Top) and<br>Figure S3 | AY964719-<br>AY964931 |      |                                                  |                                                 |                             |
|      |         |        |              |        |           |         |           |            |                     | I       | 0.00      | L       | 0.23      | L                                                                                               | 0.00  | L    | 0.04 |                                      |                       |      |                                                  |                                                 |                             |
|      |         |        |              |        |           |         |           |            |                     | P       | 0.00      | N       | 2.50      | T                                                                                               | 0.94  | S    | 0.00 |                                      |                       |      |                                                  |                                                 |                             |
|      |         |        |              |        | P         | 1.84    | K         | 2.26       | E                   | 2.10    | S         | 1.74    |           |                                                                                                 |       |      |      |                                      |                       |      |                                                  |                                                 |                             |
|      |         |        |              |        | D         | 0.73    | L         | 0.21       | L                   | 0.07    | L         | 0.94    |           |                                                                                                 |       |      |      |                                      |                       |      |                                                  |                                                 |                             |
|      |         |        |              |        | T         | 0.00    | T         | 2.14       | R                   | 1.79    | S         | 2.17    |           |                                                                                                 |       |      |      |                                      |                       |      |                                                  |                                                 |                             |
|      |         |        |              |        | T         | 1.97    | Y         | 3.28       | T                   | 2.30    | N         | 3.12    |           |                                                                                                 |       |      |      |                                      |                       |      |                                                  |                                                 |                             |
|      |         |        |              |        | Q         | 2.21    | L         | 0.01       | L                   | 0.00    | V         | 1.36    |           |                                                                                                 |       |      |      |                                      |                       |      |                                                  |                                                 |                             |
|      |         |        |              |        | L         | 0.00    | S         | 3.23       | D                   | 3.14    | T         | 2.70    |           |                                                                                                 |       |      |      |                                      |                       |      |                                                  |                                                 |                             |
|      |         |        |              |        | R         | 2.60    | L         | 0.30       | L                   | 0.45    | L         | 0.04    |           |                                                                                                 |       |      |      |                                      |                       |      |                                                  |                                                 |                             |
|      |         |        |              |        | L         | 0.00    | N         | 3.19       | Q                   | 3.15    | T         | 3.04    |           |                                                                                                 |       |      |      |                                      |                       |      |                                                  |                                                 |                             |
|      |         |        |              |        | N         | 2.51    | E         | 3.38       | T                   | 2.41    | N         | 2.84    |           |                                                                                                 |       |      |      |                                      |                       |      |                                                  |                                                 |                             |
|      |         |        |              |        | F         | 2.46    | N         | 0.03       | N                   | 0.00    | N         | 0.04    |           |                                                                                                 |       |      |      |                                      |                       |      |                                                  |                                                 |                             |
|      |         |        |              |        | N         | 0.00    | Q         | 1.52       | Q                   | 0.24    | P         | 0.13    |           |                                                                                                 |       |      |      |                                      |                       |      |                                                  |                                                 |                             |
|      |         |        |              |        | S         | 0.90    | L         | 0.03       | L                   | 0.00    | W         | 0.04    |           |                                                                                                 |       |      |      |                                      |                       |      |                                                  |                                                 |                             |
|      |         |        |              |        | L         | 0.04    | Q         | 1.72       | R                   | 1.31    | D         | 0.04    |           |                                                                                                 |       |      |      |                                      |                       |      |                                                  |                                                 |                             |
|      |         |        |              |        | S         | 0.75    | A         | 1.50       | S                   | 1.54    |           |         |           |                                                                                                 |       |      |      |                                      |                       |      |                                                  |                                                 |                             |
|      |         |        |              |        | K         | 1.58    | L         | 0.32       | V                   | 0.20    |           |         |           |                                                                                                 |       |      |      |                                      |                       |      |                                                  |                                                 |                             |
|      |         |        |              |        | L         | 0.08    | F         | 0.30       | P                   | 0.00    |           |         |           |                                                                                                 |       |      |      |                                      |                       |      |                                                  |                                                 |                             |
|      |         |        |              |        | S         | 1.70    | V         | 3.35       | K                   | 2.16    |           |         |           |                                                                                                 |       |      |      |                                      |                       |      |                                                  |                                                 |                             |
|      |         |        |              |        | P         | 2.32    | G         | 0.73       | G                   | 1.34    |           |         |           |                                                                                                 |       |      |      |                                      |                       |      |                                                  |                                                 |                             |
|      |         |        |              |        | K         | 1.62    | V         | 0.94       | A                   | 0.85    |           |         |           |                                                                                                 |       |      |      |                                      |                       |      |                                                  |                                                 |                             |
|      |         |        |              |        | A         | 0.47    | D         | 0.01       | F                   | 0.00    |           |         |           |                                                                                                 |       |      |      |                                      |                       |      |                                                  |                                                 |                             |
|      |         |        |              |        | F         | 0.04    | D         | 0.40       | D                   | 0.75    |           |         |           |                                                                                                 |       |      |      |                                      |                       |      |                                                  |                                                 |                             |
|      |         |        |              |        | H         | 0.30    |           |            |                     |         |           |         |           |                                                                                                 |       |      |      |                                      |                       |      |                                                  |                                                 |                             |
|      |         |        |              |        | VLRA      | Hagfish | Pooled    | E. stoutii | Blood               | N       | 0.11      | G       | 2.69      | K                                                                                               | 1.17  | S    | 2.03 |                                      |                       |      | Figure S2B<br>(Bottom)<br>and Figure<br>S3       | AY964719-<br>AY964931                           |                             |
|      |         |        |              |        |           |         |           |            |                     | I       | 0.00      | L       | 0.32      | L                                                                                               | 0.12  | L    | 0.40 |                                      |                       |      |                                                  |                                                 |                             |
|      |         |        |              |        |           |         |           |            |                     | P       | 0.00      | N       | 2.59      | T                                                                                               | 0.94  | S    | 1.70 |                                      |                       |      |                                                  |                                                 |                             |
| T    | 1.87    | K      | 2.07         | K      |           |         |           |            |                     | 2.05    | S         | 1.58    |           |                                                                                                 |       |      |      |                                      |                       |      |                                                  |                                                 |                             |
| D    | 0.83    | L      | 0.26         | L      |           |         |           |            |                     | 0.06    | L         | 0.98    |           |                                                                                                 |       |      |      |                                      |                       |      |                                                  |                                                 |                             |
| T    | 0.00    | T      | 1.91         | T      |           |         |           |            |                     | 1.52    | N         | 2.11    |           |                                                                                                 |       |      |      |                                      |                       |      |                                                  |                                                 |                             |
| D    | 1.15    | Y      | 3.34         | R      |           |         |           |            |                     | 2.22    | N         | 2.94    |           |                                                                                                 |       |      |      |                                      |                       |      |                                                  |                                                 |                             |
| R    | 1.63    | L      | 0.02         | L      |           |         |           |            |                     | 0.06    | I         | 1.44    |           |                                                                                                 |       |      |      |                                      |                       |      |                                                  |                                                 |                             |
| L    | 0.06    | D      | 3.29         | E      |           |         |           |            |                     | 3.18    | M         | 2.77    |           |                                                                                                 |       |      |      |                                      |                       |      |                                                  |                                                 |                             |
| D    | 2.78    | L      | 0.37         | L      |           |         |           |            |                     | 0.44    | L         | 0.00    |           |                                                                                                 |       |      |      |                                      |                       |      |                                                  |                                                 |                             |
| L    | 0.00    | N      | 3.11         | G      |           |         |           |            |                     | 3.16    | T         | 2.99    |           |                                                                                                 |       |      |      |                                      |                       |      |                                                  |                                                 |                             |
| Q    | 2.47    | Y      | 3.32         | S      |           |         |           |            |                     | 2.31    | N         | 2.84    |           |                                                                                                 |       |      |      |                                      |                       |      |                                                  |                                                 |                             |
| S    | 2.54    | N      | 0.11         | N      |           |         |           |            |                     | 0.06    | N         | 0.00    |           |                                                                                                 |       |      |      |                                      |                       |      |                                                  |                                                 |                             |
| N    | 0.00    | K      | 1.47         | Q      |           |         |           |            |                     | 0.25    | P         | 0.00    |           |                                                                                                 |       |      |      |                                      |                       |      |                                                  |                                                 |                             |
| K    | 0.97    | L      | 0.05         | L      |           |         |           |            |                     | 0.06    | W         | 0.04    |           |                                                                                                 |       |      |      |                                      |                       |      |                                                  |                                                 |                             |
| L    | 0.11    | Q      | 1.49         | R      |           |         |           |            |                     | 1.37    | D         | 0.00    |           |                                                                                                 |       |      |      |                                      |                       |      |                                                  |                                                 |                             |
| S    | 0.42    | T      | 1.74         | S      |           |         |           |            |                     | 1.07    |           |         |           |                                                                                                 |       |      |      |                                      |                       |      |                                                  |                                                 |                             |
| S    | 1.41    | L      | 0.11         | V      |           |         |           |            |                     | 0.06    |           |         |           |                                                                                                 |       |      |      |                                      |                       |      |                                                  |                                                 |                             |
| L    | 0.06    | F      | 0.08         | P      |           |         |           |            |                     | 0.00    |           |         |           |                                                                                                 |       |      |      |                                      |                       |      |                                                  |                                                 |                             |
| P    | 1.30    | P      | 3.27         | K      |           |         |           |            |                     | 1.79    |           |         |           |                                                                                                 |       |      |      |                                      |                       |      |                                                  |                                                 |                             |
| R    | 2.19    | G      | 0.72         | G      |           |         |           |            |                     | 0.25    |           |         |           |                                                                                                 |       |      |      |                                      |                       |      |                                                  |                                                 |                             |
| T    | 1.12    | V      | 0.85         | A      |           |         |           |            |                     | 0.87    |           |         |           |                                                                                                 |       |      |      |                                      |                       |      |                                                  |                                                 |                             |
| A    | 0.32    | F      | 0.07         | F      |           |         |           |            |                     | 0.06    |           |         |           |                                                                                                 |       |      |      |                                      |                       |      |                                                  |                                                 |                             |
| F    | 0.00    | D      | 0.37         | E      |           |         |           |            |                     | 0.68    |           |         |           |                                                                                                 |       |      |      |                                      |                       |      |                                                  |                                                 |                             |
| H    | 0.51    |        |              |        |           |         |           |            |                     |         |           |         |           |                                                                                                 |       |      |      |                                      |                       |      |                                                  |                                                 |                             |
| VLRA | Hagfish | Pooled | Combined     | Blood  |           |         |           |            |                     | N       | 0.05      | G       | 2.71      | K                                                                                               | 1.13  | S    | 1.59 | Figure 4<br>and Figure<br>S4         | AY964719-<br>AY964931 |      |                                                  |                                                 |                             |
|      |         |        |              |        |           |         |           |            |                     | I       | 0.00      | L       | 0.27      | L                                                                                               | 0.05  | L    | 0.22 |                                      |                       |      |                                                  |                                                 |                             |
|      |         |        |              |        |           |         |           |            |                     | P       | 0.00      | N       | 2.59      | T                                                                                               | 0.95  | S    | 1.71 |                                      |                       |      |                                                  |                                                 |                             |
|      |         |        |              |        | T         | 1.95    | K         | 2.23       | K                   | 2.11    | S         | 1.70    |           |                                                                                                 |       |      |      |                                      |                       |      |                                                  |                                                 |                             |
|      |         |        |              |        | D         | 0.77    | L         | 0.24       | L                   | 0.07    | L         | 0.97    |           |                                                                                                 |       |      |      |                                      |                       |      |                                                  |                                                 |                             |
|      |         |        |              |        | T         | 0.00    | T         | 2.08       | T                   | 1.73    | N         | 2.18    |           |                                                                                                 |       |      |      |                                      |                       |      |                                                  |                                                 |                             |
|      |         |        |              |        | D         | 2.00    | Y         | 3.33       | R                   | 2.30    | N         | 3.13    |           |                                                                                                 |       |      |      |                                      |                       |      |                                                  |                                                 |                             |
|      |         |        |              |        | R         | 2.20    | L         | 0.02       | L                   | 0.03    | I         | 1.40    |           |                                                                                                 |       |      |      |                                      |                       |      |                                                  |                                                 |                             |
|      |         |        |              |        | L         | 0.03    | D         | 3.27       | E                   | 3.19    | M         | 2.76    |           |                                                                                                 |       |      |      |                                      |                       |      |                                                  |                                                 |                             |
|      |         |        |              |        | D         | 2.71    | L         | 0.33       | L                   | 0.47    | L         | 0.03    |           |                                                                                                 |       |      |      |                                      |                       |      |                                                  |                                                 |                             |
|      |         |        |              |        | L         | 0.00    | N         | 3.20       | G                   | 3.17    | T         | 3.05    |           |                                                                                                 |       |      |      |                                      |                       |      |                                                  |                                                 |                             |
|      |         |        |              |        | Q         | 2.53    | Y         | 3.38       | S                   | 2.40    | N         | 2.88    |           |                                                                                                 |       |      |      |                                      |                       |      |                                                  |                                                 |                             |
|      |         |        |              |        | S         | 2.52    | N         | 0.06       | N                   | 0.03    | N         | 0.03    |           |                                                                                                 |       |      |      |                                      |                       |      |                                                  |                                                 |                             |
|      |         |        |              |        | N         | 0.00    | K         | 1.51       | Q                   | 0.26    | P         | 0.09    |           |                                                                                                 |       |      |      |                                      |                       |      |                                                  |                                                 |                             |
|      |         |        |              |        | K         | 0.93    | L         | 0.04       | L                   | 0.03    | W         | 0.03    |           |                                                                                                 |       |      |      |                                      |                       |      |                                                  |                                                 |                             |
|      |         |        |              |        | L         | 0.07    | Q         | 1.67       | R                   | 1.38    | D         | 0.03    |           |                                                                                                 |       |      |      |                                      |                       |      |                                                  |                                                 |                             |
|      |         |        |              |        | S         | 0.64    | T         | 1.60       | S                   | 1.43    |           |         |           |                                                                                                 |       |      |      |                                      |                       |      |                                                  |                                                 |                             |
|      |         |        |              |        | S         | 1.53    | L         | 0.26       | V                   | 0.16    |           |         |           |                                                                                                 |       |      |      |                                      |                       |      |                                                  |                                                 |                             |
|      |         |        |              |        | L         | 0.08    | P         | 0.24       | P                   | 0.00    |           |         |           |                                                                                                 |       |      |      |                                      |                       |      |                                                  |                                                 |                             |
|      |         |        |              |        | P         | 1.59    | P         | 3.35       | R                   | 1.79    |           |         |           |                                                                                                 |       |      |      |                                      |                       |      |                                                  |                                                 |                             |
|      |         |        |              |        | R         | 2.40    | G         | 0.74       | G                   | 1.08    |           |         |           |                                                                                                 |       |      |      |                                      |                       |      |                                                  |                                                 |                             |
|      |         |        |              |        | T         | 1.53    | V         | 0.92       | A                   | 0.86    |           |         |           |                                                                                                 |       |      |      |                                      |                       |      |                                                  |                                                 |                             |
|      |         |        |              |        | A         | 0.42    | F         | 0.04       | F                   | 0.03    |           |         |           |                                                                                                 |       |      |      |                                      |                       |      |                                                  |                                                 |                             |
|      |         |        |              |        | F         | 0.03    | D         | 0.40       | E                   | 0.74    |           |         |           |                                                                                                 |       |      |      |                                      |                       |      |                                                  |                                                 |                             |
|      |         |        |              |        | H         | 0.40    |           |            |                     |         |           |         |           |                                                                                                 |       |      |      |                                      |                       |      |                                                  |                                                 |                             |
|      |         |        |              |        | VLRA      |         |           |            | Monoallelic (Blood) | G       | 0.00      | G       | 2.54      |                                                                                                 |       | S    | 0.68 |                                      |                       |      | Figure 5A<br>(Bottom)<br>and Figure<br>5B (Left) | KJ734027-<br>KJ734078,<br>KJ751404-<br>KJ751454 | LRRvt not used in analysis. |
|      |         |        |              |        |           |         |           |            |                     | I       | 0.00      | L       | 0.12      |                                                                                                 |       | L    | 0.00 |                                      |                       |      |                                                  |                                                 |                             |
|      |         |        |              |        |           |         |           |            |                     | P       | 0.00      | T       | 2.60      |                                                                                                 |       | A    | 2.27 |                                      |                       |      |                                                  |                                                 |                             |
| A    | 0.50    | N      | 2.63         |        |           |         |           |            |                     |         | K         | 2.03    |           |                                                                                                 |       |      |      |                                      |                       |      |                                                  |                                                 |                             |
| S    | 0.00    | L      | 0.12         |        |           |         |           |            |                     |         | L         | 0.90    |           |                                                                                                 |       |      |      |                                      |                       |      |                                                  |                                                 |                             |
| T    | 0.00    | T      | 1.98         |        |           |         |           |            |                     |         | E         | 1.92    |           |                                                                                                 |       |      |      |                                      |                       |      |                                                  |                                                 |                             |
| E    | 0.50    | Y      | 3.24         |        |           |         |           |            |                     |         | T         | 2.55    |           |                                                                                                 |       |      |      |                                      |                       |      |                                                  |                                                 |                             |
| K    | 0.99    | L      | 0.05         |        |           |         |           |            |                     |         | L         | 1.74    |           |                                                                                                 |       |      |      |                                      |                       |      |                                                  |                                                 |                             |
| L    | 0.00    | S      | 3.43         |        |           |         |           |            |                     |         | Q         | 3.00    |           |                                                                                                 |       |      |      |                                      |                       |      |                                                  |                                                 |                             |
| Q    | 1.53    | L      | 0.50         |        |           |         |           |            |                     |         | L         | 0.42    |           |                                                                                                 |       |      |      |                                      |                       |      |                                                  |                                                 |                             |
| L    | 0.00    | S      | 3.14         |        |           |         |           |            |                     |         | D         | 3.13    |           |                                                                                                 |       |      |      |                                      |                       |      |                                                  |                                                 |                             |
| H    | 2.50    | -      | 3.25         |        |           |         |           |            |                     |         | N         | 1.44    |           |                                                                                                 |       |      |      |                                      |                       |      |                                                  |                                                 |                             |
| Y    | 1.35    | N      | 0.50         |        |           |         |           |            |                     |         | P         | 0.00    |           |                                                                                                 |       |      |      |                                      |                       |      |                                                  |                                                 |                             |
| N    | 0.00    | N      | 0.38         |        |           |         |           |            |                     |         | W         | 0.00    |           |                                                                                                 |       |      |      |                                      |                       |      |                                                  |                                                 |                             |
| Q    | 0.00    | Q      | 1.05         |        |           | D       | 0.00      |            |                     |         |           |         |           |                                                                                                 |       |      |      |                                      |                       |      |                                                  |                                                 |                             |
| L    | 0.00    | L      | 0.00         |        |           |         |           |            |                     |         |           |         |           |                                                                                                 |       |      |      |                                      |                       |      |                                                  |                                                 |                             |
| T    | 0.99    | Q      | 1.39         |        |           |         |           |            |                     |         |           |         |           |                                                                                                 |       |      |      |                                      |                       |      |                                                  |                                                 |                             |
| S    | 1.75    | S      | 0.60         |        |           |         |           |            |                     |         |           |         |           |                                                                                                 |       |      |      |                                      |                       |      |                                                  |                                                 |                             |
| I    | 0.50    | L      | 1.14         |        |           |         |           |            |                     |         |           |         |           |                                                                                                 |       |      |      |                                      |                       |      |                                                  |                                                 |                             |



|  |  |                      |       |   |      |   |      |   |      |                              |      |                                                                         |                                                                                                                                                                                                                                                                                                                                                                                                                                                                                                                                                                          |
|--|--|----------------------|-------|---|------|---|------|---|------|------------------------------|------|-------------------------------------------------------------------------|--------------------------------------------------------------------------------------------------------------------------------------------------------------------------------------------------------------------------------------------------------------------------------------------------------------------------------------------------------------------------------------------------------------------------------------------------------------------------------------------------------------------------------------------------------------------------|
|  |  |                      |       | P | 1.74 | F | 0.42 | Y | 1.21 |                              |      |                                                                         |                                                                                                                                                                                                                                                                                                                                                                                                                                                                                                                                                                          |
|  |  |                      |       | A | 2.54 | V | 2.50 | G | 0.00 |                              |      |                                                                         |                                                                                                                                                                                                                                                                                                                                                                                                                                                                                                                                                                          |
|  |  |                      |       | G | 1.27 | C | 0.79 | V | 0.84 |                              |      |                                                                         |                                                                                                                                                                                                                                                                                                                                                                                                                                                                                                                                                                          |
|  |  |                      |       | V | 0.68 | V | 1.23 | F | 0.00 |                              |      |                                                                         |                                                                                                                                                                                                                                                                                                                                                                                                                                                                                                                                                                          |
|  |  |                      |       | F | 0.21 | F | 0.00 | D | 0.12 |                              |      |                                                                         |                                                                                                                                                                                                                                                                                                                                                                                                                                                                                                                                                                          |
|  |  |                      |       | D | 1.92 | D | 0.38 |   |      |                              |      |                                                                         |                                                                                                                                                                                                                                                                                                                                                                                                                                                                                                                                                                          |
|  |  |                      |       | G | 0.00 | G | 2.57 | K | 1.43 | S                            | 1.40 |                                                                         |                                                                                                                                                                                                                                                                                                                                                                                                                                                                                                                                                                          |
|  |  |                      |       | I | 0.25 | L | 0.10 | L | 0.00 | L                            | 0.00 |                                                                         |                                                                                                                                                                                                                                                                                                                                                                                                                                                                                                                                                                          |
|  |  |                      |       | P | 0.00 | T | 2.10 | V | 1.05 | T                            | 2.31 |                                                                         |                                                                                                                                                                                                                                                                                                                                                                                                                                                                                                                                                                          |
|  |  |                      |       | T | 0.57 | K | 2.59 | N | 1.80 | K                            | 1.90 |                                                                         |                                                                                                                                                                                                                                                                                                                                                                                                                                                                                                                                                                          |
|  |  |                      |       | S | 0.81 | L | 0.09 | L | 0.00 | V                            | 1.18 |                                                                         |                                                                                                                                                                                                                                                                                                                                                                                                                                                                                                                                                                          |
|  |  |                      |       | T | 0.00 | T | 2.08 | E | 1.99 | E                            | 1.64 |                                                                         |                                                                                                                                                                                                                                                                                                                                                                                                                                                                                                                                                                          |
|  |  |                      |       | E | 0.46 | Y | 3.38 | T | 2.23 | M                            | 2.55 |                                                                         |                                                                                                                                                                                                                                                                                                                                                                                                                                                                                                                                                                          |
|  |  |                      |       | K | 1.11 | L | 0.02 | L | 0.00 | L                            | 1.79 |                                                                         |                                                                                                                                                                                                                                                                                                                                                                                                                                                                                                                                                                          |
|  |  |                      |       | L | 0.00 | N | 3.39 | W | 3.09 | Q                            | 2.74 |                                                                         |                                                                                                                                                                                                                                                                                                                                                                                                                                                                                                                                                                          |
|  |  |                      |       | Q | 1.67 | L | 0.57 | L | 0.00 | L                            | 0.59 |                                                                         |                                                                                                                                                                                                                                                                                                                                                                                                                                                                                                                                                                          |
|  |  |                      |       | L | 0.06 | D | 3.19 | R | 3.25 | H                            | 3.22 |                                                                         |                                                                                                                                                                                                                                                                                                                                                                                                                                                                                                                                                                          |
|  |  |                      |       | N | 2.55 | S | 3.27 | E | 2.78 | N                            | 1.93 |                                                                         |                                                                                                                                                                                                                                                                                                                                                                                                                                                                                                                                                                          |
|  |  |                      |       | Y | 1.46 | N | 0.06 | N | 0.06 | N                            | 0.00 |                                                                         |                                                                                                                                                                                                                                                                                                                                                                                                                                                                                                                                                                          |
|  |  |                      |       | N | 0.35 | Q | 0.93 | K | 1.34 | F                            | 0.43 |                                                                         |                                                                                                                                                                                                                                                                                                                                                                                                                                                                                                                                                                          |
|  |  |                      |       | Q | 0.60 | L | 0.03 | L | 0.00 | W                            | 0.06 |                                                                         |                                                                                                                                                                                                                                                                                                                                                                                                                                                                                                                                                                          |
|  |  |                      |       | L | 0.20 | Q | 1.47 | Q | 0.13 | D                            | 0.00 |                                                                         |                                                                                                                                                                                                                                                                                                                                                                                                                                                                                                                                                                          |
|  |  |                      |       | T | 1.76 | Y | 0.73 | S | 0.03 |                              |      |                                                                         |                                                                                                                                                                                                                                                                                                                                                                                                                                                                                                                                                                          |
|  |  |                      |       | G | 2.41 | L | 1.11 | V | 0.47 |                              |      |                                                                         |                                                                                                                                                                                                                                                                                                                                                                                                                                                                                                                                                                          |
|  |  |                      |       | I | 1.08 | P | 0.26 | P | 0.12 |                              |      |                                                                         |                                                                                                                                                                                                                                                                                                                                                                                                                                                                                                                                                                          |
|  |  |                      |       | P | 1.69 | V | 2.88 | D | 1.36 |                              |      |                                                                         |                                                                                                                                                                                                                                                                                                                                                                                                                                                                                                                                                                          |
|  |  |                      |       | F | 2.25 | G | 0.96 | G | 0.00 |                              |      |                                                                         |                                                                                                                                                                                                                                                                                                                                                                                                                                                                                                                                                                          |
|  |  |                      |       | T | 1.70 | V | 1.19 | A | 0.83 |                              |      |                                                                         |                                                                                                                                                                                                                                                                                                                                                                                                                                                                                                                                                                          |
|  |  |                      |       | A | 0.67 | F | 0.00 | F | 0.00 |                              |      |                                                                         |                                                                                                                                                                                                                                                                                                                                                                                                                                                                                                                                                                          |
|  |  |                      |       | F | 0.06 | D | 0.45 | D | 0.18 |                              |      |                                                                         |                                                                                                                                                                                                                                                                                                                                                                                                                                                                                                                                                                          |
|  |  |                      |       | Q | 2.45 |   |      |   |      |                              |      |                                                                         |                                                                                                                                                                                                                                                                                                                                                                                                                                                                                                                                                                          |
|  |  | All Species Combined | Blood |   |      |   |      |   |      |                              |      |                                                                         |                                                                                                                                                                                                                                                                                                                                                                                                                                                                                                                                                                          |
|  |  |                      |       |   |      |   |      |   |      | Figure 4<br>and Figure<br>S4 |      | KC244050-<br>KC244109<br>AB507269-<br>AB507373<br>KC733076-<br>KC733164 | Note that the "-" in the consensus sequence of other VLRC LRRV columns refer to the fact some internal LRRV modules contain 25 amino acids, compared to the majority that contain 24. Hagfish VLRC and lamprey VLRA do not contain any instances of LRRV with 25 amino acids, thus when comparing the entropies between lamprey and hagfish (Figure 4) or lamprey VLRC with lamprey VLRA (Figure S4) the column containing the gap was removed from analysis. As this group was only used for these analyses, it has not been included in the consensus column for LRRV. |
